# Supplementary material
Source: PubMed Central journal article supplement (PMC11028313)

### Supplementary Table S1. Search Strategies

Search included: PubMed and EMBASE: date was from the inception through June 2017

#### 1) PubMed search strategy

|                                                                                                                |
|----------------------------------------------------------------------------------------------------------------|
| 1. "Neoplasms"[Mesh]                                                                                           |
| 2. cancer [Title/Abstract]                                                                                     |
| 3. tumor [Title/Abstract]                                                                                      |
| 4. tumour [Title/Abstract]                                                                                     |
| 5. carcinoma* [Title/Abstract]                                                                                 |
| 6. neoplas* [Title/Abstract]                                                                                   |
| 7. malignan*[Title/Abstract]                                                                                   |
| 8. "Lymphocytes" [Mesh]                                                                                        |
| 9. "Neutrophils" [Mesh]                                                                                        |
| 10. neutrophil to lymphocyte ratio[Title/Abstract]                                                             |
| 11. neutrophil lymphocyte ratio[Title/Abstract]                                                                |
| 12. "Survival"[Mesh]                                                                                           |
| 13. "Prognosis"[Mesh]                                                                                          |
| 14. outcome*[Title/Abstract]                                                                                   |
| 15. survival[Title/Abstract]                                                                                   |
| 16. predict*[Title/Abstract]                                                                                   |
| 17. immune[Title/Abstract]                                                                                     |
| 18. immunotherapy[Title/Abstract]                                                                              |
| 19. (1 OR 2 OR 3 OR 4 OR 5 OR 6 OR 7) AND (8 OR 9 OR 10 OR 11) AND (12 OR 13 OR 14 OR 15 OR 16) AND (17 OR 18) |

#### 2) EMBASE search strategy

|                                                                                                                                                                       |
|-----------------------------------------------------------------------------------------------------------------------------------------------------------------------|
| 1. 'neoplasm'/exp                                                                                                                                                     |
| 2. cancer:ab,ti                                                                                                                                                       |
| 3. tumor:ab,ti                                                                                                                                                        |
| 4. tumour:ab,ti                                                                                                                                                       |
| 5. carcinoma:ab,ti                                                                                                                                                    |
| 6. neoplas*:ab,ti                                                                                                                                                     |
| 7. malignan*:ab,ti                                                                                                                                                    |
| 8. adenoma*:ab,ti                                                                                                                                                     |
| 9. 'lymphocyte'/exp                                                                                                                                                   |
| 10. lymphocyte                                                                                                                                                        |
| 11. 'neutrophil'/exp                                                                                                                                                  |
| 12. Neutrophil                                                                                                                                                        |
| 13. 'neutrophil-to-lymphocyte ratio'/exp                                                                                                                              |
| 14. neutrophil lymphocyte ratio:ab,ti                                                                                                                                 |
| 15. nlr:ab,ti                                                                                                                                                         |
| 16. 'n/l ratio':ab,ti                                                                                                                                                 |
| 17. 'prognosis'/exp                                                                                                                                                   |
| 18. 'survival'/exp                                                                                                                                                    |
| 19. 'mortality'/exp                                                                                                                                                   |
| 20. prognos*:ab,ti                                                                                                                                                    |
| 21. outcome*:ab,ti                                                                                                                                                    |
| 22. survival:ab,ti                                                                                                                                                    |
| 23. treatment:ab,ti                                                                                                                                                   |
| 24. predict*:ab,ti                                                                                                                                                    |
| 25. immune:ab,ti                                                                                                                                                      |
| 26. immunotherapy:ab,ti                                                                                                                                               |
| 27. (1 OR 2 OR 3 OR 4 OR 5 OR 6 OR 7 OR 8) AND (((9 OR 10) AND (11 OR 12)) OR 13 OR 14 OR 15 OR 16) AND (17 OR 18 OR 19 OR 20 OR 21 OR 22 OR 23 OR 24) AND (25 OR 26) |

**Supplementary Table S2. Methodological characteristics of included studies and quality score.**

| No. | Authors          | Year | Representativeness of population | Non exposed cohort | Ascertainment of exposure | Outcome not present at start of study | Appropriate confounding measurement and account | Sufficient measurement of outcomes | Completeness of follow-up |
|-----|------------------|------|----------------------------------|--------------------|---------------------------|---------------------------------------|-------------------------------------------------|------------------------------------|---------------------------|
| 1   | Keizman et al.   | 2012 | 0                                | 1                  | 1                         | 1                                     | 2                                               | 1                                  | 2                         |
| 2   | Botta et al.     | 2013 | 0                                | 1                  | 1                         | 1                                     | 2                                               | 1                                  | 1                         |
| 3   | Cetin et al.     | 2013 | 0                                | 1                  | 1                         | 1                                     | 2                                               | 1                                  | 2                         |
| 4   | Dirican et al.   | 2013 | 0                                | 1                  | 1                         | 1                                     | 2                                               | 1                                  | 2                         |
| 5   | Zheng et al.     | 2013 | 0                                | 1                  | 1                         | 1                                     | 2                                               | 1                                  | 2                         |
| 6   | Kobayashi et al. | 2013 | 0                                | 1                  | 1                         | 1                                     | 2                                               | 1                                  | 2                         |
| 7   | Fonseca et al.   | 2014 | 0                                | 1                  | 1                         | 1                                     | 2                                               | 1                                  | 2                         |
| 8   | Gunduz et al.    | 2014 | 0                                | 1                  | 1                         | 1                                     | 2                                               | 1                                  | 1                         |
| 9   | Keizman et al.   | 2014 | 0                                | 1                  | 1                         | 1                                     | 2                                               | 1                                  | 2                         |
| 10  | Dana et al.      | 2014 | 0                                | 1                  | 1                         | 1                                     | 2                                               | 1                                  | 0                         |
| 11  | Park et al.      | 2014 | 0                                | 1                  | 1                         | 1                                     | 2                                               | 1                                  | 2                         |
| 12  | Wang et al.      | 2014 | 0                                | 1                  | 1                         | 1                                     | 2                                               | 1                                  | 0                         |
| 13  | Ferrucci et al.  | 2015 | 0                                | 1                  | 1                         | 1                                     | 2                                               | 1                                  | 0                         |
| 14  | Namikawa et al.  | 2015 | 0                                | 1                  | 1                         | 1                                     | 2                                               | 1                                  | 0                         |
| 15  | Santoni et al.   | 2015 | 0                                | 1                  | 1                         | 1                                     | 2                                               | 1                                  | 1                         |
| 16  | Gardini et al.   | 2016 | 0                                | 1                  | 1                         | 1                                     | 2                                               | 1                                  | 0                         |
| 17  | Chrom et al.     | 2016 | 0                                | 1                  | 1                         | 1                                     | 2                                               | 1                                  | 0                         |
| 18  | Ferrucci et al.  | 2016 | 0                                | 1                  | 1                         | 1                                     | 2                                               | 1                                  | 1                         |
| 19  | Keizman et al.   | 2016 | 0                                | 1                  | 1                         | 1                                     | 2                                               | 1                                  | 0                         |
| 20  | Passardi et al.  | 2016 | 0                                | 1                  | 1                         | 1                                     | 2                                               | 1                                  | 2                         |
| 21  | Taipale et al.   | 2016 | 0                                | 1                  | 1                         | 1                                     | 2                                               | 1                                  | 0                         |
| 22  | Zhang et al.     | 2016 | 0                                | 1                  | 1                         | 1                                     | 2                                               | 1                                  | 0                         |
| 23  | Bagley et al.    | 2017 | 0                                | 1                  | 1                         | 1                                     | 2                                               | 1                                  | 0                         |
| 24  | Cassidy et al.   | 2017 | 0                                | 1                  | 1                         | 1                                     | 2                                               | 1                                  | 2                         |
| 25  | Jung et al.      | 2017 | 0                                | 1                  | 1                         | 1                                     | 2                                               | 1                                  | 0                         |
| 26  | Kuzman et al.    | 2017 | 0                                | 1                  | 1                         | 1                                     | 2                                               | 1                                  | 0                         |
| 27  | Tanaka, et al.   | 2017 | 0                                | 1                  | 1                         | 1                                     | 2                                               | 1                                  | 2                         |

**Supplementary Figure S1. Correlation between overall survival (OS) and progression-free survival (PFS).**

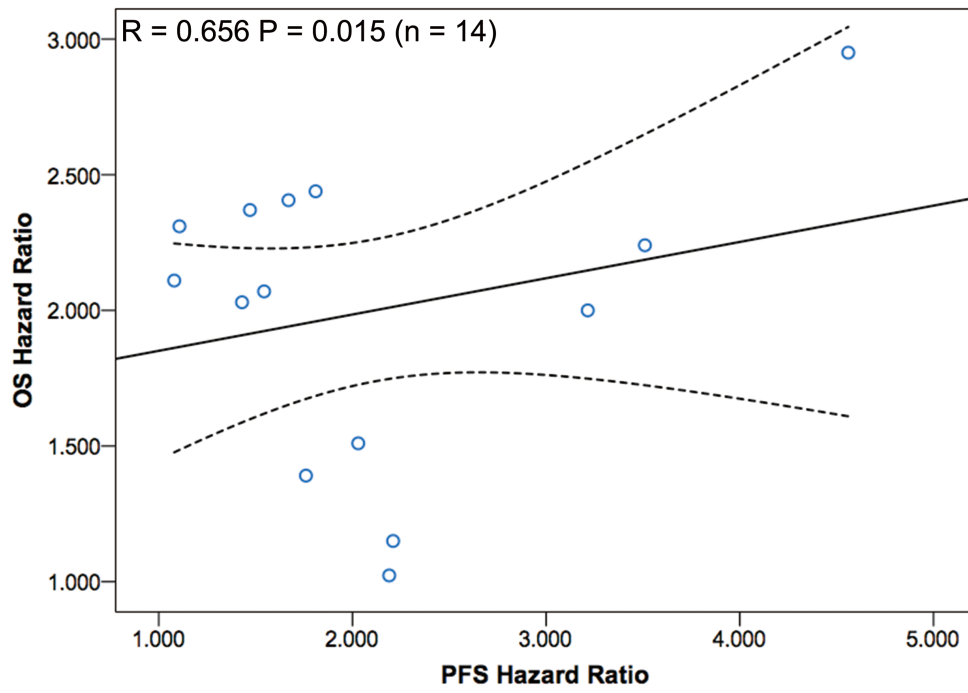

**Supplementary Figure S2. Funnel plots for (a) overall survival and (b) progression-free survival from included studies.**

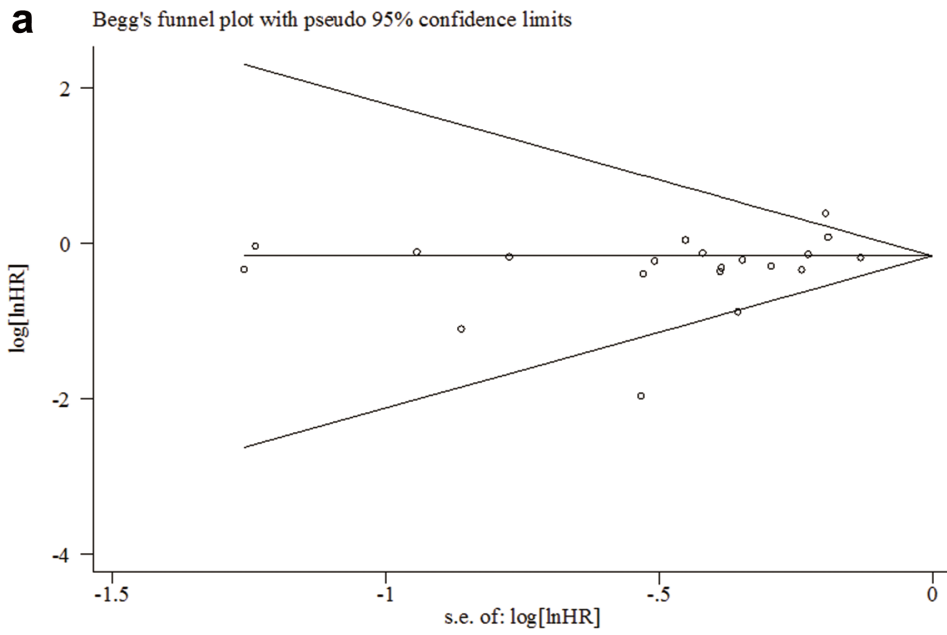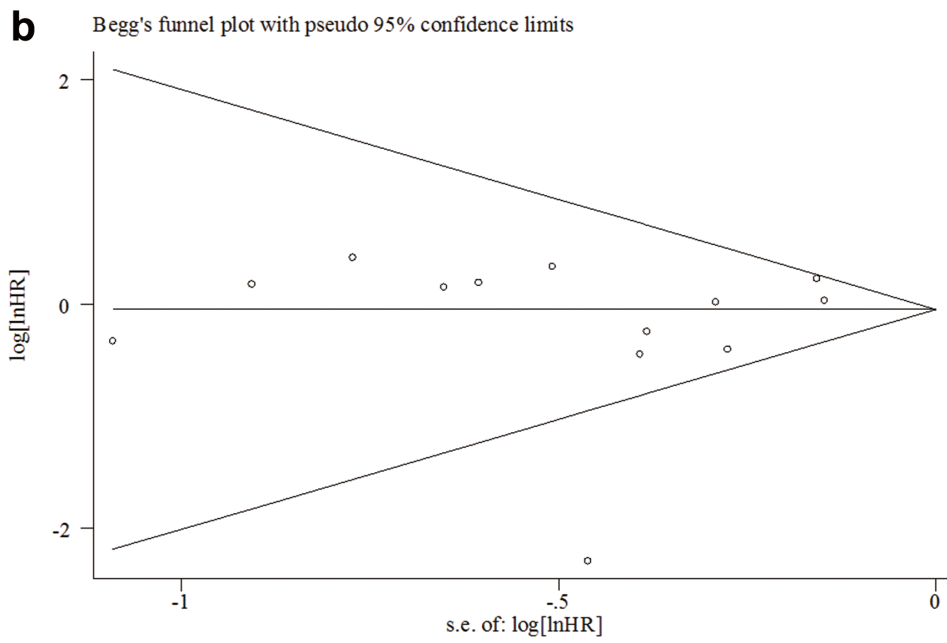

Supplement: 262_2018_2126_MOESM1_ESM.pdf [file 262_2018_2126_MOESM1_ESM.pdf]
